# Supplementary material for: EF-P Posttranslational Modification Has Variable Impact on Polyproline Translation in Bacillus subtilis
Source: PubMed Central journal article supplement (PMC5885033; doi:10.1128/mbio.00306-18), 2018-04-03

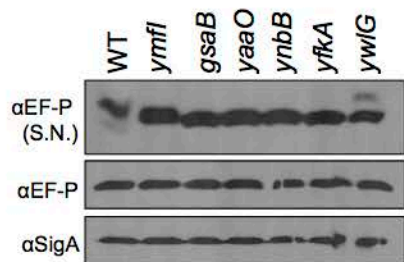

Supplement: mbo002183798sf2.pdf [file mbo002183798sf2.pdf]
