# Supplementary material for: EF-P Posttranslational Modification Has Variable Impact on Polyproline Translation in Bacillus subtilis
Source: PubMed Central journal article supplement (PMC5885033; doi:10.1128/mbio.00306-18), 2018-04-03
Supplement: mbo002183798sf4.pdf [file mbo002183798sf4.pdf]

Figure S4

Unmodified

Modified

WT

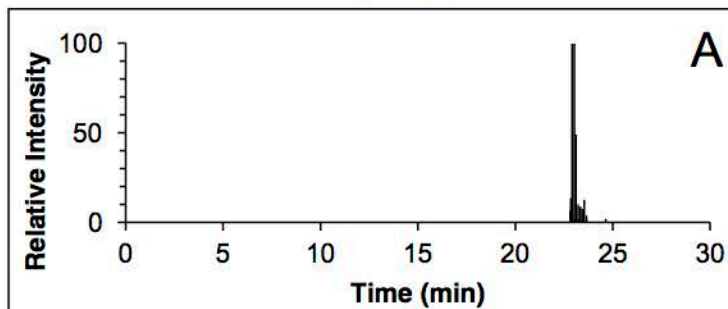

A

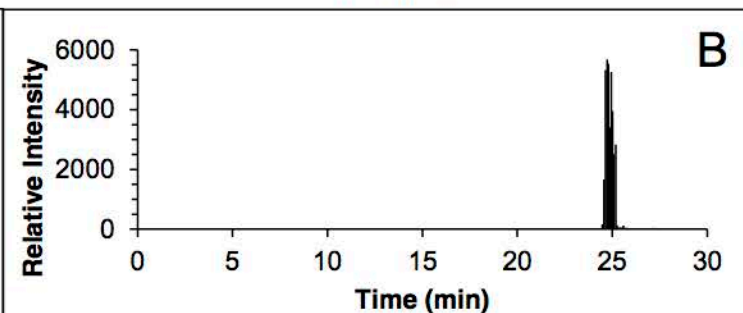

B

$\Delta yfkA$

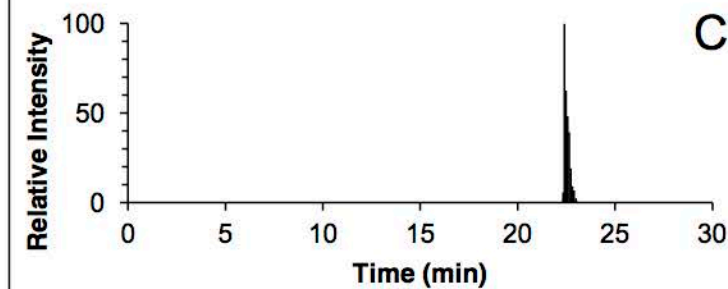

C

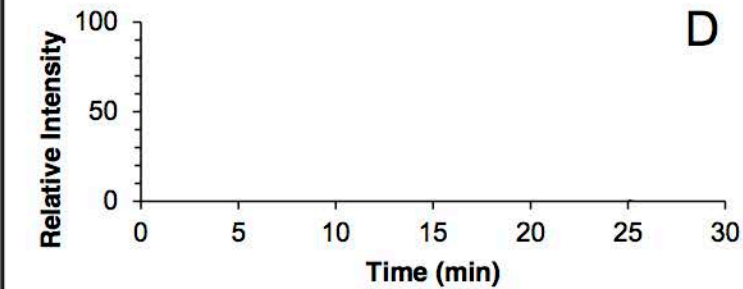

D

$\Delta ywIG$

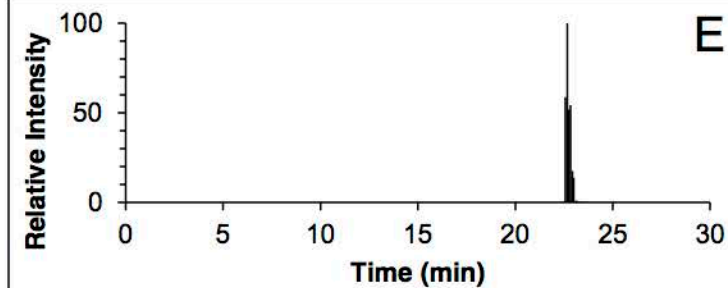

E

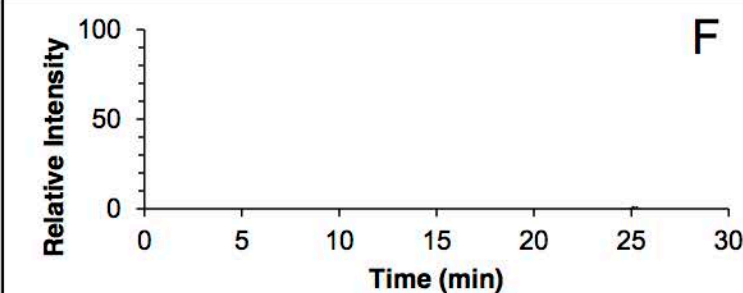

F

$\Delta yaaO$

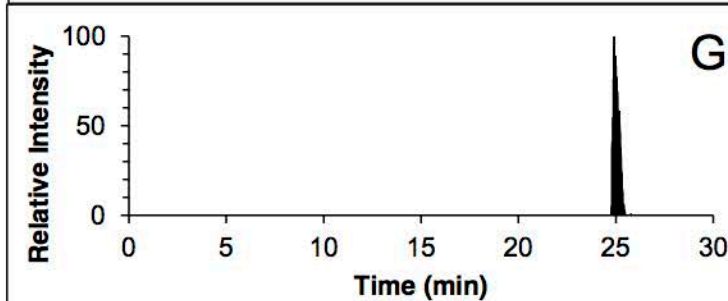

G

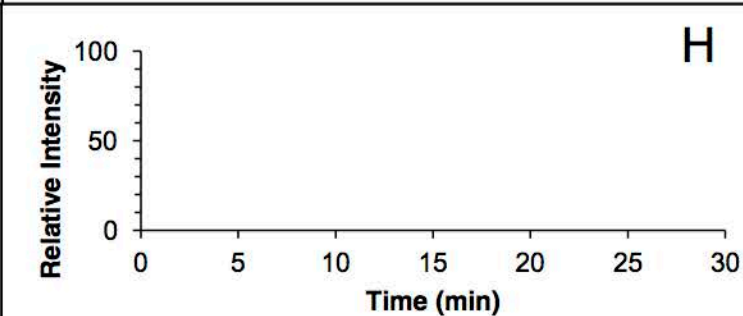

H
