# Supplementary material for: EF-P Posttranslational Modification Has Variable Impact on Polyproline Translation in Bacillus subtilis
Source: PubMed Central journal article supplement (PMC5885033; doi:10.1128/mbio.00306-18), 2018-04-03
Supplement: mbo002183798st1.pdf [file mbo002183798st1.pdf]

**Table S1.** Transposon insertion suppressors of *ymfl*

| Strain                     | Insertion tag* |
|----------------------------|----------------|
| <b><i>gsaB</i></b>         |                |
| DK4374                     | TGATCTAGA      |
| DK4367                     | TATATGATC      |
| DK4375                     | TATTTGTTG      |
| DK4304                     | TACATTTGC      |
| DK4307                     | TACAGGCCG      |
| DK4376                     | TAGCTATCG      |
| DK4384                     | TACATAAAG      |
| DK4372                     | TACATAAAG      |
| DK4373                     | TATGTGCTG      |
| <b><i>yaaO</i></b>         |                |
| DK4308                     | TATCGTGCC      |
| DK4371                     | TATAAAGGT      |
| DK4305                     | TATATAAAG      |
| DK4300                     | TAAGAACCC      |
| DK4366                     | TACATAAGC      |
| DK4382                     | TATAGCCAG      |
| DK4306                     | TATCTTCTG      |
| <b><i>ynbAB operon</i></b> |                |
| <i>ynbA</i>                |                |
| DK4302                     | TATACTTCT      |
| DK4365                     | TACATATAC      |
| <i>ynbB</i>                |                |
| DK4370                     | TAATGTGTC      |
| DK4369                     | TAAAGGAGC      |
| DK4364                     | TATAGCCGA      |
| DK4381                     | TATGAGCAA      |
| DK4301                     | TAGGCTGGA      |
| DK4383                     | TAATTCGAT      |
| <b><i>yfkA</i></b>         |                |
| DK4303                     | TATTCACCG      |
| <b><i>ywIG</i></b>         |                |
| DK4368                     | TAGATGCTT      |

\*The insertion tag indicates the 9 basepairs immediately adjacent to the transposon insertion element upstream of the kanamycin resistance cassette.
