# Supplementary material for: EF-P Posttranslational Modification Has Variable Impact on Polyproline Translation in Bacillus subtilis
Source: PubMed Central journal article supplement (PMC5885033; doi:10.1128/mbio.00306-18), 2018-04-03
Supplement: mbo002183798st2.pdf [file mbo002183798st2.pdf]

**Table S2.** Phenotype microarray conditions where WT and  $\Delta efp$  display differences in relative growth

| <b>Growth Condition<br/>(WT Enhanced Respiration)</b> | <b>PM</b> | <b>Mode</b>            |
|-------------------------------------------------------|-----------|------------------------|
| 2,3-Butanone                                          | 2A        | C-Source, Alcohol      |
| Sodium Benzoate, pH 5.0                               | 9         | Toxicity, Benzoate     |
| Sodium Sulfate                                        | 9         | Osmotic Sensitivity    |
| Sodium Formate                                        | 9         | Osmotic Sensitivity    |
| Urea                                                  | 9         | Osmotic Sensitivity    |
| Sodium Nitrate                                        | 9         | Toxicity               |
| Sodium Nitrite                                        | 9         | Toxicity               |
| pH 4.5                                                | 10        | pH                     |
| pH 4.5 + AA                                           | 10        | pH, decarboxylase      |
| pH 4.5 + Ornithine                                    | 10        | pH, decarboxylase      |
| pH 4.5 + Cysteic acid                                 | 10        | pH, decarboxylase      |
| pH 4.5 + Diamino-Pimelic Acid                         | 10        | pH, decarboxylase      |
| pH 4.5 + Urea                                         | 10        | pH, decarboxylase      |
| Tobramycine                                           | 12B       | Protein Synthesis, 30S |
| Nickel Chloride                                       | 13B       | Toxic Cation           |
| 2, 2' Dipyrldyl                                       | 13B       | Chelator, Lipophilic   |
| Potassium Chromate                                    | 13B       | Toxic Cation           |
| Oxolinic Acid                                         | 13B       | DNA Topoisomerase      |
| Doxycycline                                           | 13B       | Protein Synthesis, 30S |
| Cesium Chloride                                       | 13B       | Toxic Cation           |
| Thallium (I) Acetate                                  | 13B       | Toxic Cation           |
| Cobalt Chloride                                       | 13B       | Toxic Cation           |
| Manganese (II) Chloride                               | 13B       | Toxic Cation           |
| Cupric Chloride                                       | 13B       | Toxic Cation           |
| Acriflavine                                           | 14        | DNA intercalator       |
| Furaltadone                                           | 14        | Nitro Compound         |
| 1-Hydroxypyridine-2-thione                            | 14        | Biofilm Inhibitor      |
| Sodium Cyanate                                        | 14        | Toxic Anion            |
| Iodoacetate                                           | 14        | Oxidizes Sulfhydryls   |
| Sodium Dichromate                                     | 14        | Toxic Anion            |
| Cefoxitin                                             | 14        | Wall                   |
| Sodium Metaborate                                     | 14        | Toxic Anion            |
| Carbenicillin                                         | 14        | Wall                   |
| Nitrite                                               | 14        | Toxic Anion            |
| EDTA                                                  | 15        | Chelator, Hydrophilic  |
| 5,7-Dichloro-8-hydroxy-quinalone                      | 15        | Chelator, Lipophilic   |
| 5,7-Dichloro-8-hydroxyquinoline                       | 15        | Chelator, Lipophilic   |
| Nitrofurazone                                         | 15        | Nitro Compound         |
| Menadione                                             | 15        | Respiration            |

|                                |     |                                        |
|--------------------------------|-----|----------------------------------------|
| 2-Nitroimidazole               | 15  | Nitro Compound                         |
| Norfloxacin                    | 16  | DNA topoisomerase                      |
| Protamine Sulfate              | 16  | Membrane                               |
| Cinoxacin                      | 16  | DNA Topoisomerase                      |
| Streptomycin                   | 16  | Protein Synthesis, 30S                 |
| Sorbic Acid                    | 16  | Respiration                            |
| D-Serine                       | 17  | Inhibits 3PGA dehydrogenase            |
| Sodium salicylate              | 17  | Biofilm Inhibitor                      |
| Aminotriazole                  | 17  | Inhibits Catalase, Histidine           |
| Compound 48/80                 | 17  | cyclic AMP phosphodiesterase inhibitor |
| D,L-Methionine hydroxamate     | 17  | tRNA synthetase                        |
| Phenylarsine Oxide             | 17  | Tyrosine Phosphatase Inhibitor         |
| Ketoprofen                     | 18C | Biofilm Inhibitor                      |
| Pyrophosphate                  | 18C | Chelator, Hydrophilic                  |
| Thiamphenicol                  | 18C | Protein Synthesis, 30S                 |
| Sodium m-arsenite              | 18C | Toxic Anion                            |
| Sodium Bromate                 | 18C | Toxic Anion                            |
| Lidocaine                      | 18C | Ion Channel Inhibitor                  |
| Sodium Periodate               | 18C | Toxic Anion                            |
| Hexamminecobalt (III) Chloride | 19  | DNA Syntehsis                          |
| Ornidazole                     | 20  | Nitro Compound                         |
| Patulin                        | 20  | microtubulin polymerization inhibitor  |

| <b>Growth Condition<br/>(<math>\Delta</math>efp Enhanced Respiration)</b> | <b>PM</b> | <b>Mode</b>                               |
|---------------------------------------------------------------------------|-----------|-------------------------------------------|
| D-Glucose-1-Phosphate                                                     | 3         | P-Source, Organic                         |
| Sulfadiazine                                                              | 12B       | Folate Antagonist, PABA analog            |
| Sulfamethazine                                                            | 12B       | Folate Antagonist, PABA analog            |
| Sulfathiazole                                                             | 12B       | Folate Antagonist, PABA analog            |
| Sulfamethoxazole                                                          | 12B       | Folate Antagonist, PABA analog            |
| Cefuroxime                                                                | 13B       | Wall, cephalosporin                       |
| Puromycin                                                                 | 15        | Protein Synthesis, 30S                    |
| Sulfanilamide                                                             | 16        | Folate Antagonist, PABA analog            |
| Trimethoprim                                                              | 16        | Folate Antagonist, PABA analog            |
| 1-Chloro-2,4-dinitrobenzene                                               | 16        | Oxidizes sulfhydryls, depletes gluathione |
| Sulfachloropyridazine                                                     | 17        | Folate Antagonist, PABA analog            |
| Sulfamonomethoxine                                                        | 17        | Folate Antagonist, PABA analog            |
| Sulfisoxazole                                                             | 17        | Folate Antagonist, PABA analog            |
| Plumbagin                                                                 | 18        | Oxidizing Agent                           |
