# Supplementary material for: EF-P Posttranslational Modification Has Variable Impact on Polyproline Translation in Bacillus subtilis
Source: PubMed Central journal article supplement (PMC5885033; doi:10.1128/mbio.00306-18), 2018-04-03
Supplement: mbo002183798st3.pdf [file mbo002183798st3.pdf]

**Table S3: Strains**

| Strain | Genotype                                                                                                   | Reference      |
|--------|------------------------------------------------------------------------------------------------------------|----------------|
| 3610   | Wild type                                                                                                  |                |
| DK1042 | <i>comI</i> <sup>Q12L</sup>                                                                                | Konkol, 2013   |
| DK2050 | <i>comI</i> <sup>Q12L</sup> $\Delta$ efp                                                                   | Rajkovic, 2016 |
| DK2448 | <i>comI</i> <sup>Q12L</sup> $\Delta$ efp amyE::P <sub>hyspank</sub> -efp-flag spec                         | Rajkovic, 2016 |
| DK2886 | <i>comI</i> <sup>Q12L</sup> $\Delta$ efp ymf1::tet                                                         | Hummels, 2017  |
| DK3621 | <i>comI</i> <sup>Q12L</sup> ymf1::tet                                                                      | Hummels, 2017  |
| DK3780 | <i>comI</i> <sup>Q12L</sup> $\Delta$ efp amyE::P <sub>yqhS</sub> -efp cat                                  | Hummels, 2017  |
| DK3789 | <i>comI</i> <sup>Q12L</sup> $\Delta$ efp ymf1::tet amyE::P <sub>yqhS</sub> -efp cat                        | Hummels, 2017  |
| DK3894 | <i>comI</i> <sup>Q12L</sup> $\Delta$ yaaO                                                                  |                |
| DK3908 | <i>comI</i> <sup>Q12L</sup> $\Delta$ yaaO efp::tet amyE::P <sub>hyspank</sub> -efp-flag spec               |                |
| DK4077 | <i>comI</i> <sup>Q12L</sup> $\Delta$ yaaO ymf1::tet                                                        |                |
| DK4300 | <i>comI</i> <sup>Q12L</sup> $\Delta$ efp ymf1::tet amyE::P <sub>yqhS</sub> -efp cat yaaO::TnYLB kan        |                |
| DK4301 | <i>comI</i> <sup>Q12L</sup> $\Delta$ efp ymf1::tet amyE::P <sub>yqhS</sub> -efp cat ynbB::TnYLB kan        |                |
| DK4302 | <i>comI</i> <sup>Q12L</sup> $\Delta$ efp ymf1::tet amyE::P <sub>yqhS</sub> -efp cat ynbA::TnHyJump kan     |                |
| DK4303 | <i>comI</i> <sup>Q12L</sup> $\Delta$ efp ymf1::tet amyE::P <sub>yqhS</sub> -efp cat yfkA::TnHyJump kan     |                |
| DK4304 | <i>comI</i> <sup>Q12L</sup> $\Delta$ efp ymf1::tet amyE::P <sub>yqhS</sub> -efp cat gsaB::TnHyJump kan     |                |
| DK4305 | <i>comI</i> <sup>Q12L</sup> $\Delta$ efp ymf1::tet amyE::P <sub>yqhS</sub> -efp cat yaaO::TnHyJump kan     |                |
| DK4306 | <i>comI</i> <sup>Q12L</sup> $\Delta$ efp ymf1::tet amyE::P <sub>yqhS</sub> -efp cat yaaO::TnHyJump kan     |                |
| DK4307 | <i>comI</i> <sup>Q12L</sup> $\Delta$ efp ymf1::tet amyE::P <sub>yqhS</sub> -efp cat gsaB::TnHyJump kan     |                |
| DK4308 | <i>comI</i> <sup>Q12L</sup> $\Delta$ efp ymf1::tet amyE::P <sub>yqhS</sub> -efp cat yaaO::TnHyJump kan     |                |
| DK4310 | <i>comI</i> <sup>Q12L</sup> $\Delta$ efp amyE::P <sub>hyspank</sub> -efp-flag spec ynbB::TnYLB kan         |                |
| DK4313 | <i>comI</i> <sup>Q12L</sup> $\Delta$ efp amyE::P <sub>hyspank</sub> -efp-flag spec gsaB::TnHyJump kan      |                |
| DK4364 | <i>comI</i> <sup>Q12L</sup> $\Delta$ efp ymf1::tet amyE::P <sub>yqhS</sub> -efp cat ynbB::TnYLB kan        |                |
| DK4365 | <i>comI</i> <sup>Q12L</sup> $\Delta$ efp ymf1::tet amyE::P <sub>yqhS</sub> -efp cat ynbA::TnYLB kan        |                |
| DK4366 | <i>comI</i> <sup>Q12L</sup> $\Delta$ efp ymf1::tet amyE::P <sub>yqhS</sub> -efp cat yaaO::TnYLB kan        |                |
| DK4367 | <i>comI</i> <sup>Q12L</sup> $\Delta$ efp ymf1::tet amyE::P <sub>yqhS</sub> -efp cat gsaB::TnYLB kan        |                |
| DK4368 | <i>comI</i> <sup>Q12L</sup> $\Delta$ efp ymf1::tet amyE::P <sub>yqhS</sub> -efp cat ywlG::TnYLB kan        |                |
| DK4369 | <i>comI</i> <sup>Q12L</sup> $\Delta$ efp ymf1::tet amyE::P <sub>yqhS</sub> -efp cat ynbB::TnYLB kan        |                |
| DK4370 | <i>comI</i> <sup>Q12L</sup> $\Delta$ efp ymf1::tet amyE::P <sub>yqhS</sub> -efp cat ynbB::TnYLB kan        |                |
| DK4371 | <i>comI</i> <sup>Q12L</sup> $\Delta$ efp ymf1::tet amyE::P <sub>yqhS</sub> -efp cat yaaO::TnYLB kan        |                |
| DK4372 | <i>comI</i> <sup>Q12L</sup> $\Delta$ efp ymf1::tet amyE::P <sub>yqhS</sub> -efp cat gsaB::TnYLB kan        |                |
| DK4373 | <i>comI</i> <sup>Q12L</sup> $\Delta$ efp ymf1::tet amyE::P <sub>yqhS</sub> -efp cat gsaB::TnYLB kan        |                |
| DK4374 | <i>comI</i> <sup>Q12L</sup> $\Delta$ efp ymf1::tet amyE::P <sub>yqhS</sub> -efp cat gsaB::TnYLB kan        |                |
| DK4375 | <i>comI</i> <sup>Q12L</sup> $\Delta$ efp ymf1::tet amyE::P <sub>yqhS</sub> -efp cat gsaB::TnYLB kan        |                |
| DK4376 | <i>comI</i> <sup>Q12L</sup> $\Delta$ efp ymf1::tet amyE::P <sub>yqhS</sub> -efp cat gsaB::TnYLB kan        |                |
| DK4381 | <i>comI</i> <sup>Q12L</sup> $\Delta$ efp ymf1::tet amyE::P <sub>yqhS</sub> -efp cat ynbB::TnYLB kan        |                |
| DK4382 | <i>comI</i> <sup>Q12L</sup> $\Delta$ efp ymf1::tet amyE::P <sub>yqhS</sub> -efp cat yaaO::TnYLB kan        |                |
| DK4383 | <i>comI</i> <sup>Q12L</sup> $\Delta$ efp ymf1::tet amyE::P <sub>yqhS</sub> -efp cat ynbB::TnYLB kan        |                |
| DK4384 | <i>comI</i> <sup>Q12L</sup> $\Delta$ efp ymf1::tet amyE::P <sub>yqhS</sub> -efp cat gsaB::TnHyJump kan     |                |
| DK4564 | <i>comI</i> <sup>Q12L</sup> $\Delta$ yfkA                                                                  |                |
| DK4572 | <i>comI</i> <sup>Q12L</sup> $\Delta$ yfkA efp::tet amyE::P <sub>hyspank</sub> -efp-flag spec               |                |
| DK4573 | <i>comI</i> <sup>Q12L</sup> $\Delta$ efp amyE::P <sub>hyspank</sub> -efp-flag spec ywlG::TnYLB kan         |                |
| DK4601 | <i>comI</i> <sup>Q12L</sup> $\Delta$ gsaB                                                                  |                |
| DK4604 | <i>comI</i> <sup>Q12L</sup> $\Delta$ ynbB                                                                  |                |
| DK4605 | <i>comI</i> <sup>Q12L</sup> $\Delta$ ynbA                                                                  |                |
| DK4612 | <i>comI</i> <sup>Q12L</sup> $\Delta$ ywlG                                                                  |                |
| DK4815 | <i>comI</i> <sup>Q12L</sup> $\Delta$ gsaB $\Delta$ yaaO efp::tet amyE::P <sub>hyspank</sub> -efp-flag spec |                |
| DK5170 | <i>comI</i> <sup>Q12L</sup> $\Delta$ yfkA ymf1::tet                                                        |                |
| DK5171 | <i>comI</i> <sup>Q12L</sup> $\Delta$ gsaB ymf1::tet                                                        |                |
| DK5172 | <i>comI</i> <sup>Q12L</sup> $\Delta$ ynbB ymf1::tet                                                        |                |
| DK5173 | <i>comI</i> <sup>Q12L</sup> $\Delta$ ynbA ymf1::tet                                                        |                |
| DK5174 | <i>comI</i> <sup>Q12L</sup> $\Delta$ ywlG ymf1::tet                                                        |                |

DK5165 *comI*<sup>Q12L</sup>  $\Delta yfkA$  amyE::P<sub>yfkA</sub>-yfkA spec  
 DK5166 *comI*<sup>Q12L</sup>  $\Delta ywlG$  amyE::P<sub>ywlF</sub>-ywlG spec  
 DK5167 *comI*<sup>Q12L</sup>  $\Delta yaaO$  amyE::P<sub>xpcA</sub>-yaaO spec  
 DK5304 *comI*<sup>Q12L</sup>  $\Delta yfkA$  ymfl::tet amyE::P<sub>yfkA</sub>-yfkA spec  
 DK5305 *comI*<sup>Q12L</sup>  $\Delta yaaO$  ymfl::tet amyE::P<sub>xpcA</sub>-yaaO spec  
 DK5308 *comI*<sup>Q12L</sup>  $\Delta gsaB$  amyE::P<sub>gsaB</sub>-gsaB spec  
 DK5309 *comI*<sup>Q12L</sup>  $\Delta ynbB$  amyE::P<sub>ynbA</sub>-ynbB spec  
 DK5310 *comI*<sup>Q12L</sup>  $\Delta ynbA$  amyE::P<sub>ynbA</sub>-ynbA spec  
 DK5320 *comI*<sup>Q12L</sup>  $\Delta gsaB$  ymfl::tet amyE::P<sub>gsaB</sub>-gsaB spec  
 DK5321 *comI*<sup>Q12L</sup>  $\Delta ynbB$  ymfl::tet amyE::P<sub>ynbA</sub>-ynbB spec  
 DK5322 *comI*<sup>Q12L</sup>  $\Delta ynbA$  ymfl::tet amyE::P<sub>ynbA</sub>-ynbA spec  
 DK5323 *comI*<sup>Q12L</sup> ymfl::tet ynbA::TnYLB kan  
 DK5326 *comI*<sup>Q12L</sup>  $\Delta ywlG$  ymfl::tet amyE::P<sub>ywlF</sub>-ywlG spec  
 DK5327 *comI*<sup>Q12L</sup>  $\Delta yaaO$  amyE::P<sub>hyspank</sub>-yaaO spec  
 DK5328 *comI*<sup>Q12L</sup>  $\Delta yaaO$  ymfl::tet amyE::P<sub>hyspank</sub>-yaaO spec  
 DK5339 *comI*<sup>Q12L</sup> ymfl::tet ynbA::TnHyJump kan  
 DK5340 *comI*<sup>Q12L</sup> ymfl::tet ynbA::TnHyJump kan amyE::P<sub>ynbA</sub>-ynbB spec  
 DK5342 *comI*<sup>Q12L</sup> ymfl::tet ynbA::TnYLB kan amyE::P<sub>ynbA</sub>-ynbB spec  
 DS235 ymfl::tet  
 DS354 *efp*::tet  
 DS2197 *sfp*<sup>0</sup> swrA pMarA kan mls  
 DS7853 *sfp*<sup>0</sup> swrA pTnHyJump kan mls  
 AW112 *comI*<sup>Q12L</sup> amyE::P<sub>hyspank</sub>-gfp  
 AW113 *comI*<sup>Q12L</sup> amyE::P<sub>hyspank</sub>-ppw-gfp  
 AW114 *comI*<sup>Q12L</sup>  $\Delta efp$  amyE::P<sub>hyspank</sub>-gfp  
 AW115 *comI*<sup>Q12L</sup>  $\Delta efp$  amyE::P<sub>hyspank</sub>-ppw-gfp  
 AW118 *comI*<sup>Q12L</sup>  $\Delta gsaB$  amyE::P<sub>hyspank</sub>-gfp  
 AW119 *comI*<sup>Q12L</sup>  $\Delta gsaB$  amyE::P<sub>hyspank</sub>-ppw-gfp  
 AW120 *comI*<sup>Q12L</sup>  $\Delta ynbB$  amyE::P<sub>hyspank</sub>-gfp  
 AW121 *comI*<sup>Q12L</sup>  $\Delta ynbB$  amyE::P<sub>hyspank</sub>-ppw-gfp  
 AW122 *comI*<sup>Q12L</sup>  $\Delta yfkA$  amyE::P<sub>hyspank</sub>-gfp  
 AW123 *comI*<sup>Q12L</sup>  $\Delta yfkA$  amyE::P<sub>hyspank</sub>-ppw-gfp  
 AW124 *comI*<sup>Q12L</sup>  $\Delta ywlG$  amyE::P<sub>hyspank</sub>-gfp  
 AW125 *comI*<sup>Q12L</sup>  $\Delta ywlG$  amyE::P<sub>hyspank</sub>-ppw-gfp  
 AW126 *comI*<sup>Q12L</sup> amyE::spec  
 AW146 *comI*<sup>Q12L</sup> amyE::P<sub>hyspank</sub>-fabF  
 AW147 *comI*<sup>Q12L</sup> amyE::P<sub>hyspank</sub>-fabG  
 AW148 *comI*<sup>Q12L</sup> amyE::P<sub>hyspank</sub>-accB  
 AW149 *comI*<sup>Q12L</sup> amyE::P<sub>hyspank</sub>-ppp-gfp  
 AW150 *comI*<sup>Q12L</sup>  $\Delta efp$  amyE::P<sub>hyspank</sub>-ppp-gfp  
 AW156 *comI*<sup>Q12L</sup> ymfl::tet amyE::P<sub>hyspank</sub>-ppp-gfp  
 AW157 *comI*<sup>Q12L</sup>  $\Delta yaaO$  amyE::P<sub>hyspank</sub>-ppp-gfp  
 AW158 *comI*<sup>Q12L</sup>  $\Delta gsaB$  amyE::P<sub>hyspank</sub>-ppp-gfp  
 AW159 *comI*<sup>Q12L</sup>  $\Delta ynbB$  amyE::P<sub>hyspank</sub>-ppp-gfp  
 AW160 *comI*<sup>Q12L</sup>  $\Delta yfkA$  amyE::P<sub>hyspank</sub>-ppp-gfp  
 AW161 *comI*<sup>Q12L</sup>  $\Delta ywlG$  amyE::P<sub>hyspank</sub>-ppp-gfp  
 AW163 *comI*<sup>Q12L</sup> amyE::P<sub>hyspank</sub>-ppe-gfp  
 AW164 *comI*<sup>Q12L</sup>  $\Delta efp$  amyE::P<sub>hyspank</sub>-ppe-gfp  
 AW165 *comI*<sup>Q12L</sup> ymfl::tet amyE::P<sub>hyspank</sub>-ppe-gfp  
 AW166 *comI*<sup>Q12L</sup>  $\Delta yaaO$  amyE::P<sub>hyspank</sub>-ppe-gfp  
 AW167 *comI*<sup>Q12L</sup>  $\Delta gsaB$  amyE::P<sub>hyspank</sub>-ppe-gfp  
 AW168 *comI*<sup>Q12L</sup>  $\Delta ynbB$  amyE::P<sub>hyspank</sub>-ppe-gfp  
 AW169 *comI*<sup>Q12L</sup>  $\Delta yfkA$  amyE::P<sub>hyspank</sub>-ppe-gfp  
 AW170 *comI*<sup>Q12L</sup>  $\Delta ywlG$  amyE::P<sub>hyspank</sub>-ppe-gfp  
 RT01 *comI*<sup>Q12L</sup> ymfl::tet amyE::P<sub>hyspank</sub>-gfp

Kearns, 2004  
 Kearns, 2004  
 Le Breton, 2006  
 Pozsgai, 2012

RT02 *comI*<sup>Q12L</sup> *ymfl::tet amyE::P<sub>hyspank</sub>-ppw-gfp*  
RT03 *comI*<sup>Q12L</sup> *ΔyaaO amyE::P<sub>hyspank</sub>-gfp*  
RT04 *comI*<sup>Q12L</sup> *ΔyaaO amyE::P<sub>hyspank</sub>-ppw-gfp*  
BEC11340 *lacA::P<sub>xyI</sub>-dcas9 amyE::P<sub>veq</sub>-sgRNA(fabF)*  
BEC15910 *lacA::P<sub>xyI</sub>-dcas9 amyE::P<sub>veq</sub>-sgRNA(fabG)*  
BEC24350 *lacA::P<sub>xyI</sub>-dcas9 amyE::P<sub>veq</sub>-sgRNA(accB)*

---

---
