# Supplementary material for: EF-P Posttranslational Modification Has Variable Impact on Polyproline Translation in Bacillus subtilis
Source: PubMed Central journal article supplement (PMC5885033; doi:10.1128/mbio.00306-18), 2018-04-03
Supplement: mbo002183798st4.pdf [file mbo002183798st4.pdf]

**Table S4:** Plasmids

| <b>Plasmid</b> | <b>Genotype</b>                                   | <b>Reference</b>                               |
|----------------|---------------------------------------------------|------------------------------------------------|
| pAH25          | <i>amyE spec amp</i>                              | Gift from Amy Camp, Mt. Holyoke College        |
| pDR111         | <i>amyE::P<sub>hyspank</sub> spec amp</i>         | Gift from David Rudner, Harvard Medical School |
| pMimiMAD       | <i>oriP<sup>f.s</sup> mls amp</i>                 | (Patrick and Kearns, 2008)                     |
| pKRH58         | $\Omega\Delta yaaO$ <i>mls amp</i>                |                                                |
| pKRH69         | $\Omega\Delta yfkA$ <i>mls amp</i>                |                                                |
| pKRH70         | $\Omega\Delta ynbB$ <i>mls amp</i>                |                                                |
| pKRH71         | $\Omega\Delta ynbA$ <i>mls amp</i>                |                                                |
| pKRH72         | $\Omega\Delta gsaB$ <i>mls amp</i>                |                                                |
| pKRH73         | $\Omega\Delta ywIG$ <i>mls amp</i>                |                                                |
| pKRH86         | <i>amyE::P<sub>ynbA-ynbB</sub> spec amp</i>       |                                                |
| pKRH87         | <i>amyE::P<sub>yfkA-yfkA</sub> spec amp</i>       |                                                |
| pKRH88         | <i>amyE::P<sub>ywIF-ywIG</sub> spec amp</i>       |                                                |
| pKRH89         | <i>amyE::P<sub>xpcA-yaaO</sub> spec amp</i>       |                                                |
| pKRH90         | <i>amyE::P<sub>gsaB-gsaB</sub> spec amp</i>       |                                                |
| pKRH101        | <i>amyE::P<sub>ynbA-ynbA</sub> spec amp</i>       |                                                |
| pKRH112        | <i>amyE::P<sub>hyspank-yaaO</sub> spec amp</i>    |                                                |
| pAW40          | <i>amyE::P<sub>hyspank-ppw-gfp</sub> spec amp</i> | Rajkovic, 2016                                 |
| pAW92          | <i>amyE::P<sub>hyspank-gfp</sub> spec amp</i>     | Rajkovic, 2016                                 |
| pAW93          | <i>amyE::P<sub>hyspank-ppp-gfp</sub> spec amp</i> | Rajkovic, 2016                                 |
| pAW162         | <i>amyE::P<sub>hyspank-ppe-gfp</sub> spec amp</i> |                                                |
| pAW143         | <i>amyE::P<sub>hyspank-fabF</sub> spec amp</i>    |                                                |
| pAW144         | <i>amyE::P<sub>hyspank-fabG</sub> spec amp</i>    |                                                |
| pAW145         | <i>amyE::P<sub>hyspank-accB</sub> spec amp</i>    |                                                |
