# Supplementary material for: EF-P Posttranslational Modification Has Variable Impact on Polyproline Translation in Bacillus subtilis
Source: PubMed Central journal article supplement (PMC5885033; doi:10.1128/mbio.00306-18), 2018-04-03
Supplement: mbo002183798st5.pdf [file mbo002183798st5.pdf]

**Table S5: Primers**

| Primer | Sequence                                                                |
|--------|-------------------------------------------------------------------------|
| 695    | GCTTGTAATTCTATCATAATTG                                                  |
| 696    | AGGGAATCATTTGAAGGTTGG                                                   |
| 1657   | TTAAGCTTAGTCGACAGTAAGGAGGAACTACTATGAGTAAACCGCCGGAAAAGAGAAGAACTTTTCACTGG |
| 2567   | GTACATCCGCAACTGTCCATA                                                   |
| 2818   | TCTCCAATCAGGCTTGA                                                       |
| 4933   | GTCGACTCTAGAGGATCCCCGAAGCAACAGGCTGAATCGA                                |
| 4934   | TTCATATCCCTTGAACATGCGTTCTCGCATGTTGAATTAATGCTT                           |
| 4935   | AAGCATTAATTCAACATGCGAGAACGCATGTTCAAGGGAATATGAA                          |
| 4936   | GTGAATTCGAGCTCGGTACCCATCCTGAACGACGAGGTCTT                               |
| 5279   | GTCGACTCTAGAGGATCCCATAATATGGCCCTCATCTGAC                                |
| 5280   | TTACGCCCGAGTTTGACCCTTATTATCAGGATACAGACTTCAC                             |
| 5281   | GTGAAGTCTGTATCCTGATAATAAGGGTCAAACCTCGGGCGTA                             |
| 5282   | GTGAATTCGAGCTCGGTACCCGGTAGAGCTGGCGAACGAG                                |
| 5283   | GTCGACTCTAGAGGATCCCCCTGCCAAGCGGCTACAG                                   |
| 5284   | CAATGAATCCACTGCACTGCACTTCAATAATTCTCCGTGTGTT                             |
| 5285   | AACACACGGAGAATTATTGAAGTGCAGTGCAGTGGATTCAATTG                            |
| 5286   | GTGAATTCGAGCTCGGTACCCGAAGCGGGACATGTCGCC                                 |
| 5287   | GTCGACTCTAGAGGATCCCCTATATCGGACACACCGCCC                                 |
| 5288   | ATAGCCGGATATGTCATACTGATGCGGCAGCTGACATCCG                                |
| 5289   | CGGATGTCAGCTGCCGCATCAGTATGACATATCCGGCTAT                                |
| 5290   | GTGAATTCGAGCTCGGTACCCAATGAGAGATCCCGCCATCA                               |
| 5291   | GTCGACTCTAGAGGATCCCCGAAGCGCTTCGGCTACATG                                 |
| 5292   | TATGTGCTGTGGTAATAAACCAACCGCCGACAATGTGCTGT                               |
| 5293   | ACAGCACATTGTCGGCGGTTGGTTTATTACCACAGCACATA                               |
| 5294   | GTGAATTCGAGCTCGGTACCCGTCGTCACCGGCAGATTCT                                |
| 5295   | GTCGACTCTAGAGGATCCCCGAAAGTAGCCATTGCATCGG                                |
| 5296   | CGGCCGTGTACGCGCCAATTGGTCTGAAACTCAGACAG                                  |
| 5297   | CTGTCTGAGTTTCAGGACCAATTGGCGCGTACACGGCCG                                 |
| 5298   | GTGAATTCGAGCTCGGTACCCATTTCTTCGCGCGGTCAC                                 |
| 5877   | AGGAGGAAGCTTGATACTCGCCGGATATTCAC                                        |
| 5878   | TCCTCGCTAGCTGCATATTGGGCAGTAGTATTA                                       |
| 5879   | AGGAGGCTAGCTCGGTGAATTAAGAAGTATATG                                       |
| 5880   | TCCTCGCATGCGATGTAAGGATTCTTAACATCAA                                      |
| 5881   | AGGAGGGATCCTCCAGGTCATCAAGCATGCT                                         |
| 5882   | AGGAGGGATCCTCCAGGTCATCAAGCATGCT                                         |
| 5883   | TCCTCGCTAGCATCTCCGTAAGTGTTCCTTTCA                                       |
| 5884   | AGGAGAAGCTTTGAATGTCAATGTCCGCTCG                                         |
| 5885   | TCCTCGCTAGCTTCCTCCAGCGTGTGTGA                                           |
| 5886   | AGGAGGCTAGCGCGTATTGGAAAAATCTCCGA                                        |
| 5887   | TCCTCGAATTCAAGTTCGGAATTTATTTCACTATCT                                    |
| 5888   | AGGAGAAGCTTTGAGAAAAATCAAACAAATACAAA                                     |
| 5889   | TCCTCGCTAGCTGTGTCTATACTCAGTTTTATTAT                                     |
| 5909   | TCCTCGCTAGCGGGATCGATACAAATATTCAAG                                       |
| 5945   | AGGAGGCATGCGTGTTAATGTGTCAAACATGTC                                       |
| 5946   | AGGAGGGATCCGAAAATCGCATGCTTCAGTTGT                                       |
| 6102   | ATTAAGCTTAGTCGACAGTAAGGAGGAACTACTATGACTAAAAAAGAGTAGTTGTTACAGGACTTG      |
| 6103   | CGAATTAGCTTGCATGTTATGATTGATATTTTTAAAGATTAATGTTGCGTTGTG                  |
| 6104   | ATTAAGCTTAGTCGACAGTAAGGAGGAACTACTATGCAAAGTTTACAACATAAAACTGCACTAATC      |
| 6105   | CGAATTAGCTTGCATGTTAAGGATTTGTTGACCATAATCCCGCTG                           |
| 6106   | AATTAAGCTTAGTCGACAGTAAGGAGGAACTACTATGTTAAATATCAAAGAAATCCACGAGCTG        |
| 6107   | CGAATTAGCTTGCATGTTACTCCGCTTTTACAAGAAATAGAGGTTGTC                        |
| 7514   | CCGAATTAGCTTGCATGTTAATTTGTAGAGCTCATCCATGCCATGTG                         |
